### Erratum

**Green, J. A., Butler, P. J., Woakes, A. J., Boyd, I. L. and Holder, R. L.** (2000). Heart rate and rate of oxygen consumption of exercising macaroni penguins. *J. Exp. Biol.* **204**, 673–684.

This paper was unfortunately printed with two small errors. We would like to take this opportunity to correct these errors for all readers.

(1) On p. 679, Equation 12, which currently reads:

$$s\dot{V}_{O_2} = -118.18f_H + 0.29, \quad (12)$$

should read:

$$s\dot{V}_{O_2} = 0.29f_H - 18.88, \quad (12)$$

(2) On p. 676, the third sentence of the last paragraph, which currently reads:

Analysis of covariance (ANCOVA) was used to compare the values of the constants  $a$  (the slope) and  $b$  (the intercept) of the individual regressions within each group.

should read:

Analysis of covariance (ANCOVA) was used to compare the values of the constants  $b$  (the slope) and  $a$  (the intercept) of the individual regressions within each group.

The authors apologise for any inconvenience this may have caused.
